# Supplementary material for: Photocontrollable induction of supramolecular chirality in achiral side chain Azo-containing polymers through preferential chiral solvation
Source: Royal Society of Chemistry journal article supplement (doi:10.1039/c5py00496a), 2015-01-01
Supplement: c5py00496a1.zip [file c5py00496a1.zip]

**Supporting Information for**

**Photocontrollable Induction of Supramolecular Chirality in Achiral**

**Side Chain Azo-containing Polymers through Preferential Chiral**

**Solvation**

Shunqin Jiang, Yin Zhao, Laibing Wang, Lu Yin, Zhengbiao Zhang, Jian Zhu, Wei  
Zhang\* and Xiulin Zhu

Suzhou Key Laboratory of Macromolecular Design and Precision Synthesis, Jiangsu  
Key Laboratory of Advanced Functional Polymer Design and Application, College of  
Chemistry, Chemical Engineering and Materials Science, Soochow University,  
Suzhou Industrial Park, Suzhou 215123, China

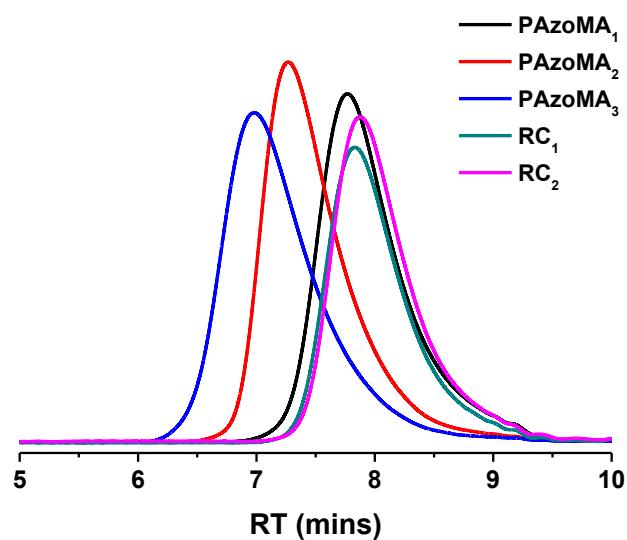

**Fig. S1** GPC curves of PAzoMAs and P(AzoMA-*rans*-MMA)s.

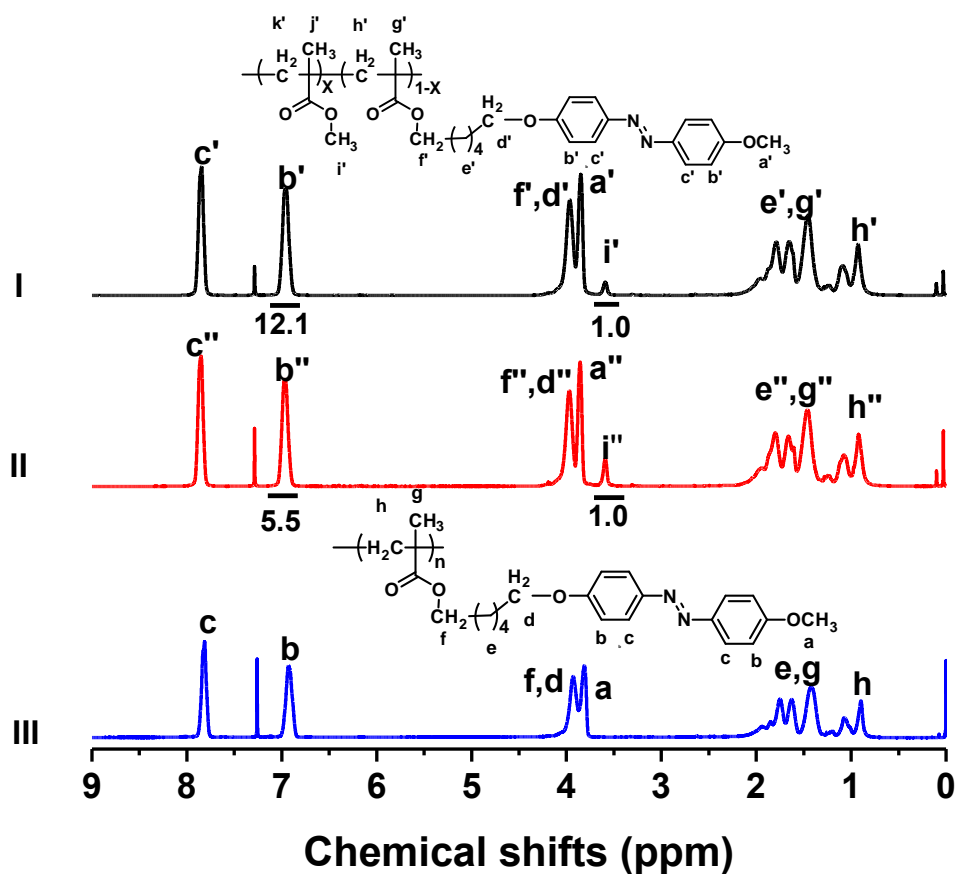

**Fig. S2**  $^1\text{H}$  NMR spectra of P(AzoMA-*rans*-MMA)s (I and II) and PAzoMA (III). The molar ratio of AzoMA and MMA was determined by the integration of  $i'$  and  $b'$  for  $\text{RC}_1$  and  $i''$  and  $b''$  for  $\text{RC}_2$ .

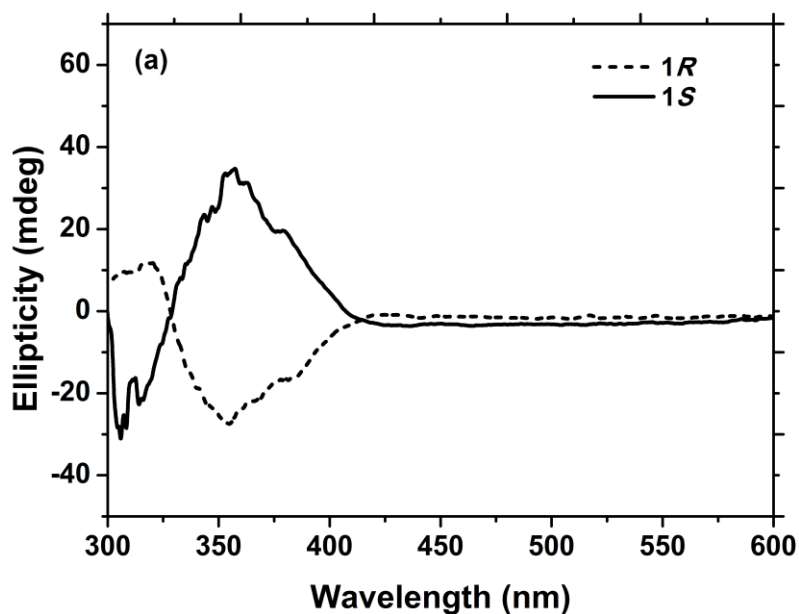

**Fig. S3** CD spectra of PAzoMA aggregates in mixed cosolvents. DCE/(1*R* or 1*S*) = 0.5/2.5, [repeating units]<sub>0</sub> =  $1.26 \times 10^{-4}$  mol/L.

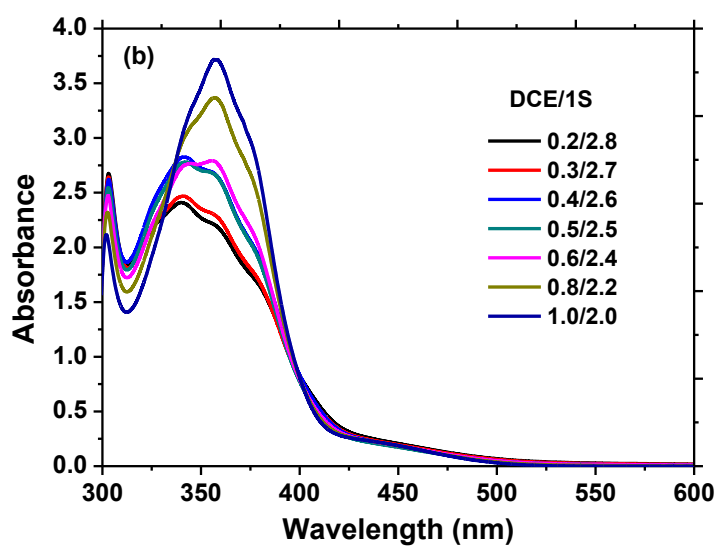

**Fig. S4** UV-vis spectra of PAzoMA aggregates with different DCE/1*S* volume fractions. [repeating units]<sub>0</sub> =  $1.26 \times 10^{-4}$  mol/L.

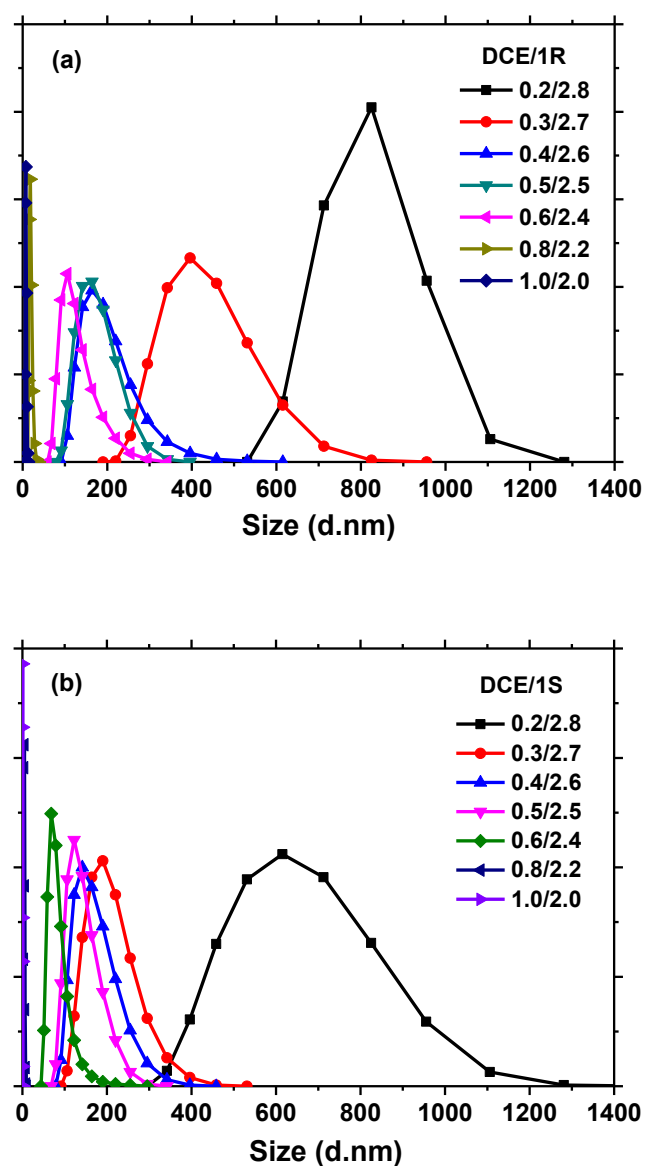

**Fig. S5** Intensity-average size distributions for PAzoMA aggregates with different DCE/(1R or 1S) volume fractions.  $[\text{repeating units}]_0 = 1.26 \times 10^{-4} \text{ mol/L}$ .

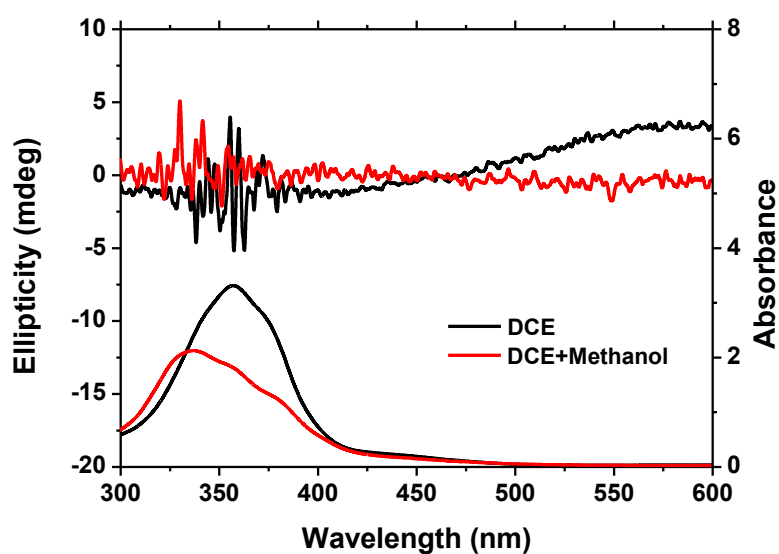

**Fig. S6** UV-vis and CD spectra of PAzoMA aggregates in DCE and DCE/CH<sub>3</sub>OH (0.5/2.5, v/v). [repeating units]<sub>0</sub> =  $1.26 \times 10^{-4}$  mol/L.

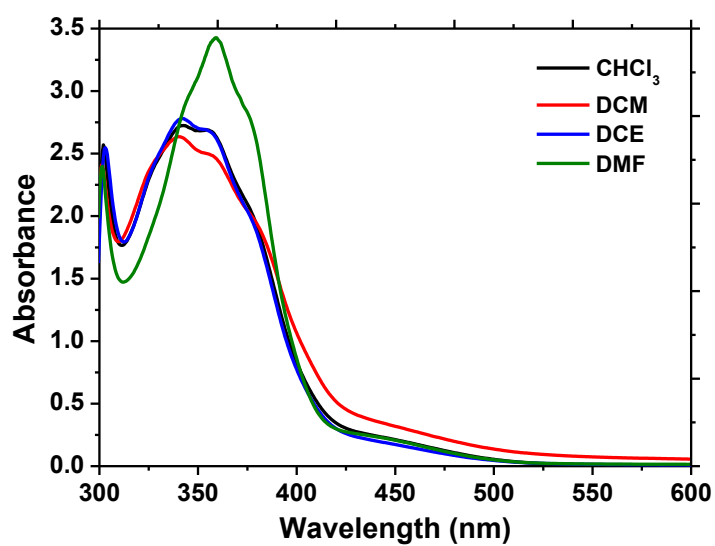

**Fig. S7** UV-vis spectra of PAzoMA aggregates in mixed solvents with different good solvents. Good solvent/1S = 0.5/2.5 (v/v). [repeating units]<sub>0</sub> =  $1.26 \times 10^{-4}$  mol/L.

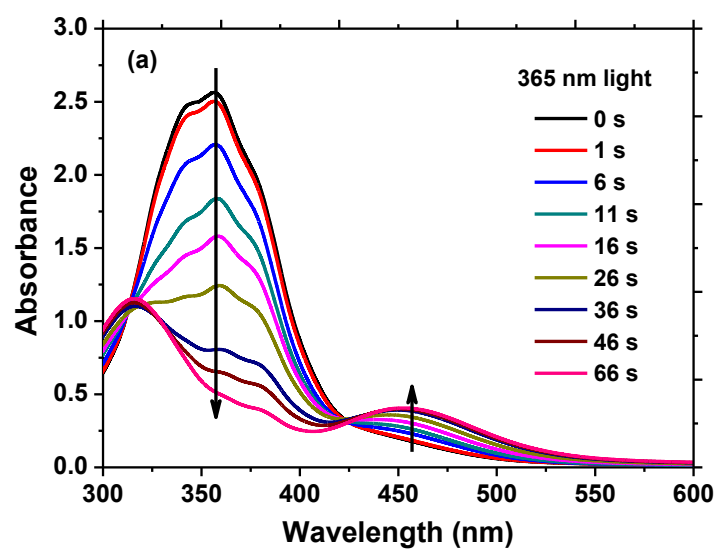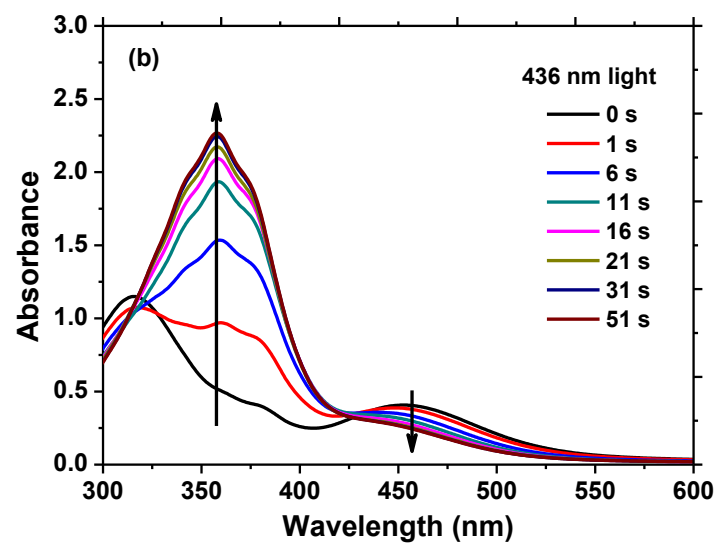

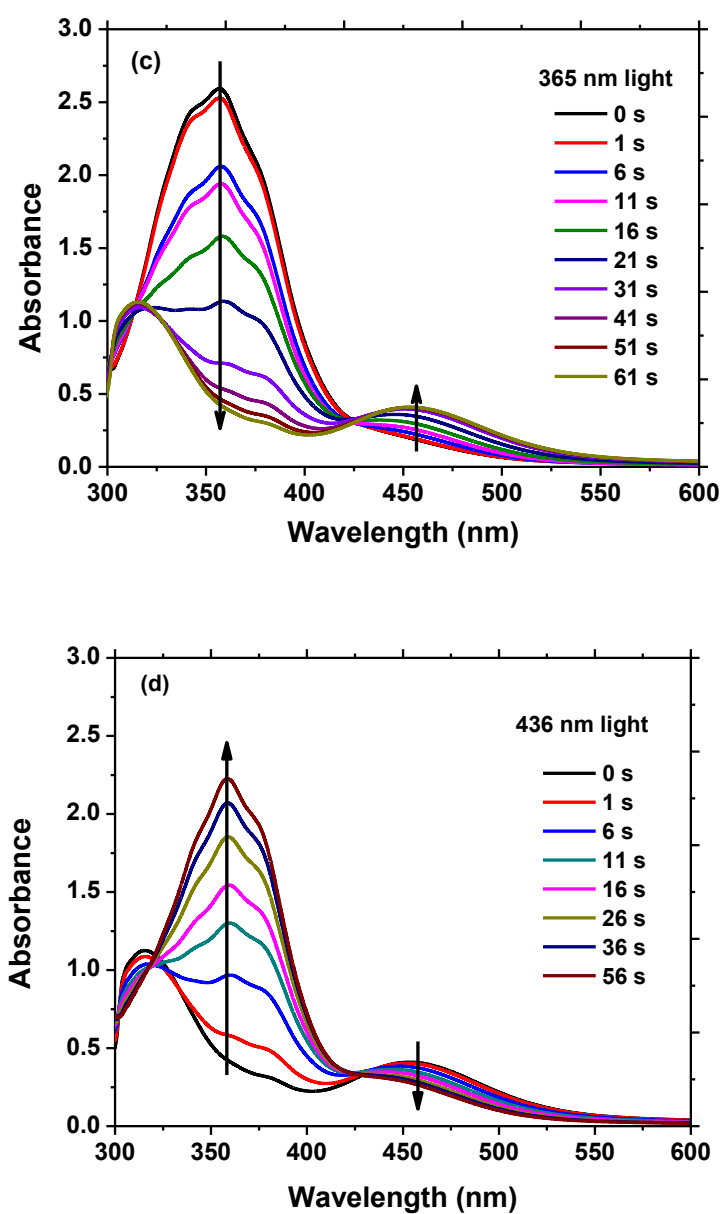

**Fig. S8** Photoisomerization switching of the UV-vis spectra ((a,b) DCE/1*R* and (c,d) DCE/1*S*) of PAzoMA aggregates by alternating irradiation with 365 nm and 436 nm light.

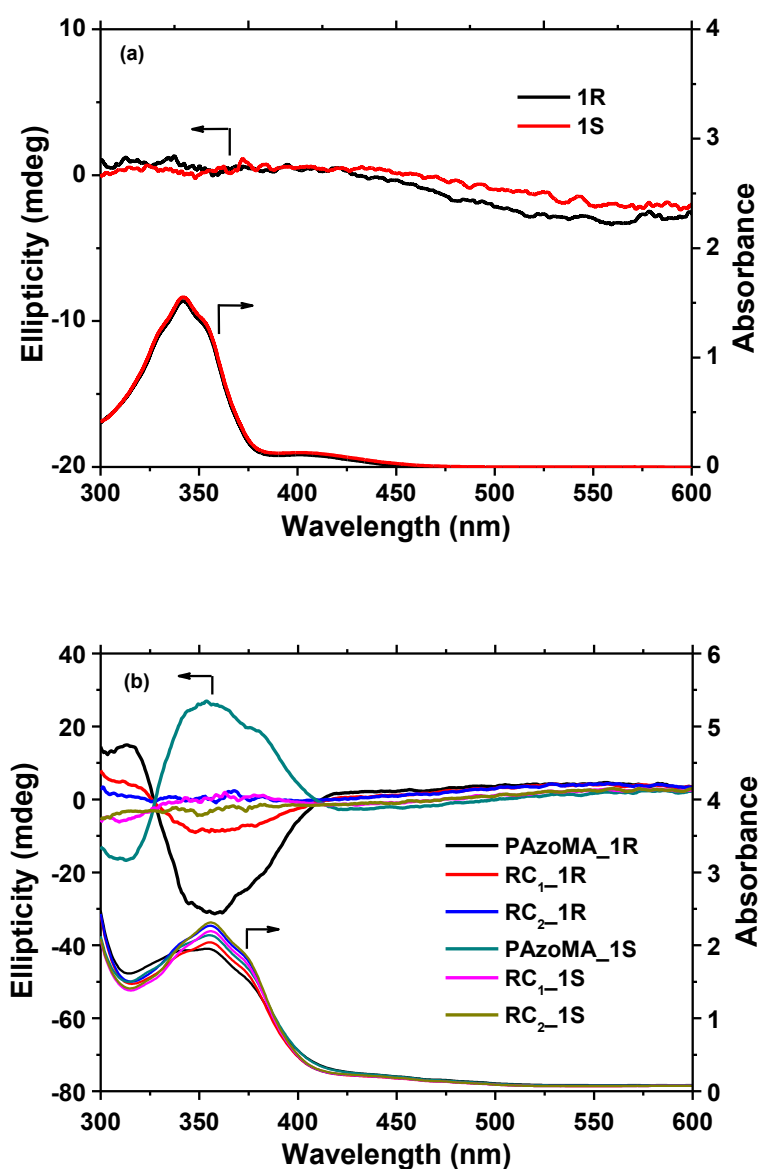

**Fig. S9** UV-vis and CD spectra of AzoMA (a) and PAzoMA and P(AzoMA-*rans*-MMA) aggregates with different MMA contents (b) in mixed tersolvents. DCE/(1R or 1S) = 2.5/0.5 (v/v), [repeating units]<sub>0</sub> =  $8.41 \times 10^{-5}$  mol/L.



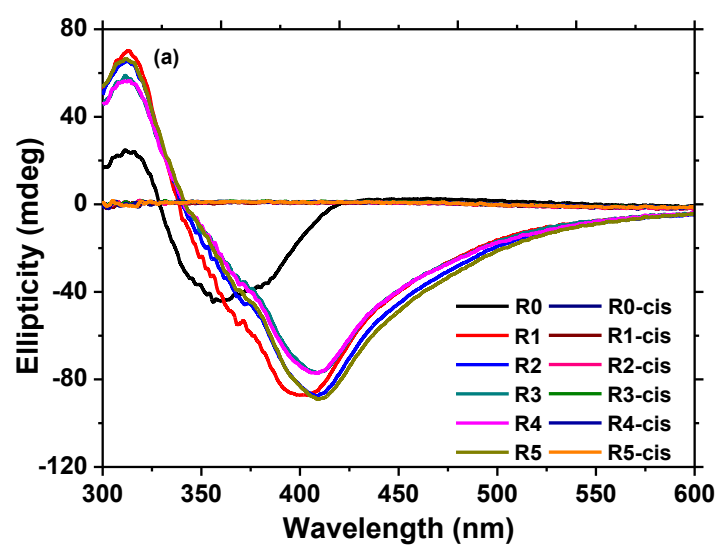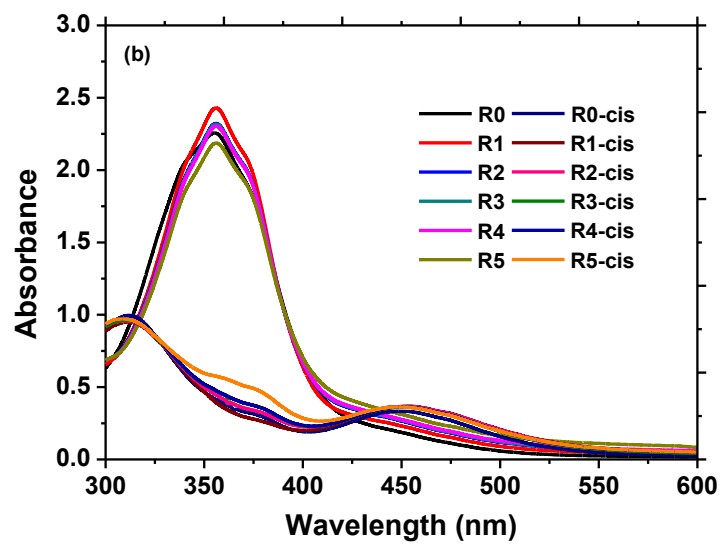

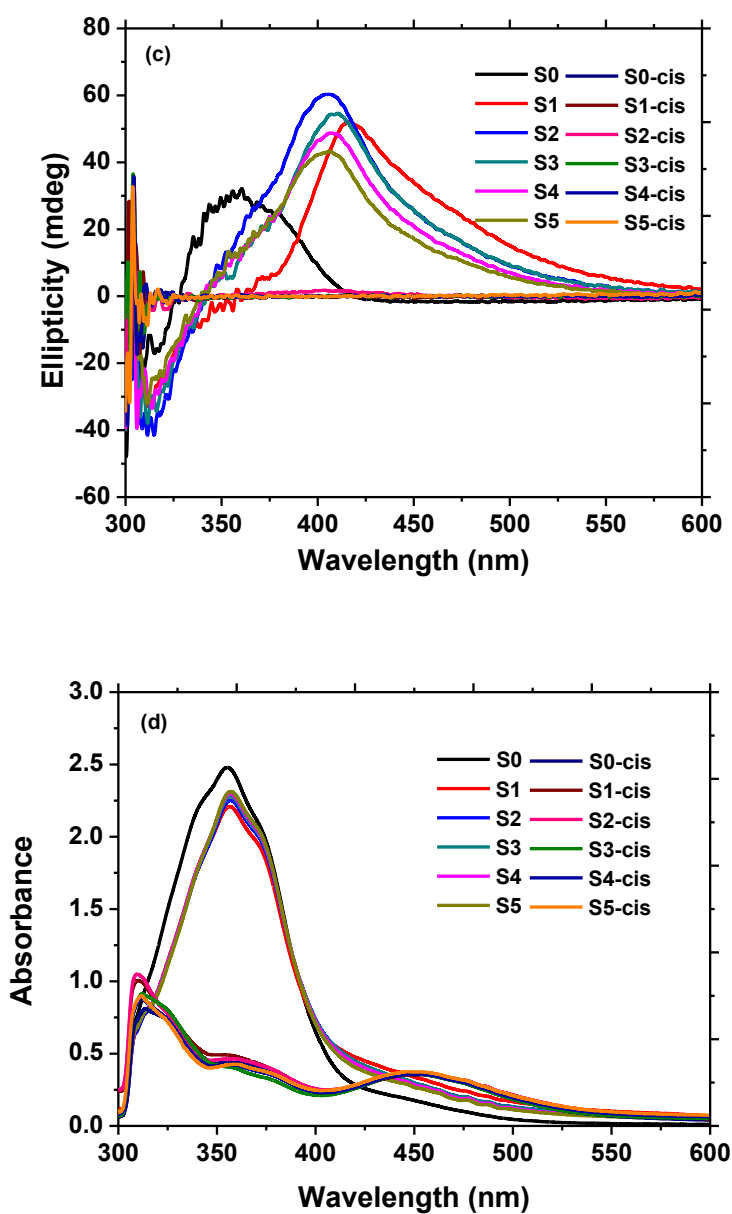

**Fig. S10** Chiroptical switching of the CD ((a) for DCE/1R and (c) for DCE/1S) and UV-vis spectra ((b) for DCE/1R and (d) for DCE/1S) of PAzoMA aggregates by alternating with 365 nm light irradiation for 2 min and keeping at 60 °C for 40 min. DCE/(1R or 1S) = 2.5/0.5 (v/v), [repeating units]<sub>0</sub> =  $1.26 \times 10^{-4}$  mol/L.
